# Supplementary material for: In vitro simulated semi-dynamic gastrointestinal digestion: evaluation of the effects of processing on whey proteins digestibility and allergenicity
Source: Royal Society of Chemistry journal article supplement (doi:10.1039/d1fo04102a), 2022-01-01
Supplement: d1fo04102a1.pdf [file d1fo04102a1.pdf]

## ***In vitro* simulated semi-dynamic gastrointestinal digestion: evaluation of the effects of processing on whey proteins digestibility and allergenicity**

Alessandra Gasparini<sup>a†</sup>, Sara Benedé<sup>a</sup>, Tullia Tedeschi<sup>b</sup>, Stefano Sforza<sup>b</sup>, Isidra Recio<sup>a</sup>, Beatriz Miralles<sup>a</sup>

<sup>a</sup>Instituto de Investigación en Ciencias de la Alimentación, CIAL (CSIC-UAM, CEI UAM+CSIC), Nicolás Cabrera, 9, 28049 Madrid, Spain.

<sup>b</sup>Food and Drug Department, University of Parma, Parco Area delle Scienze, 27/A - 43124, Parma, Italy.

† Present address: Faculty of Science and Technology, Free university of Bozen-Bolzano, Piazza Università 5, 39100, Bolzano, Italy.

Corresponding author: Beatriz Miralles

Nicolás Cabrera, 9. 28049 Madrid, Spain

Phone: +34 910017940

Fax: +34 910017905

E-mail: [beatriz.miralles@csic.es](mailto:beatriz.miralles@csic.es)

**Table S1** Individual sera of the pool used for the ELISA IgE inhibition test (na: data not available).

| Patient | Age (years) | IgE (kU/L)<br>Cow milk | IgE (kU/L)<br>Casein | IgE (kU/L)<br>$\beta$ -LG | IgE (kU/L)<br>$\alpha$ -LA |
|---------|-------------|------------------------|----------------------|---------------------------|----------------------------|
| 1       | 2           | na                     | 12.1                 | 17.2                      | 33.9                       |
| 2       | 1           | 35.5                   | 37.7                 | 3.7                       | 22.5                       |
| 3       | 1           | >100                   | >100                 | >100                      | >100                       |
| 4       | 2           | 30.9                   | 14.7                 | 23.7                      | 0.7                        |
| 5       | 7           | 41.0                   | 34.0                 | 12.0                      | 14.0                       |

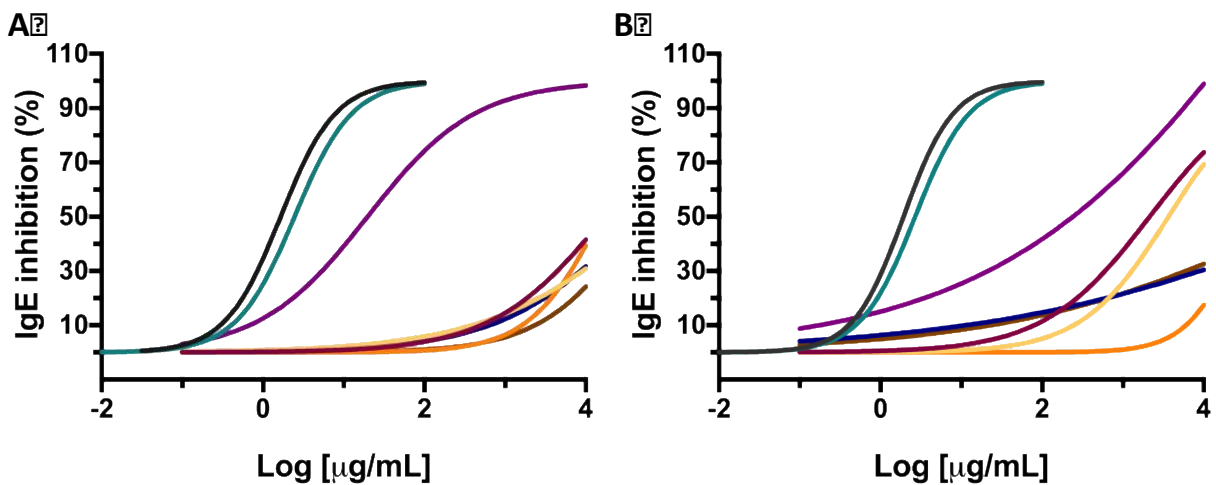

**Figure S1** Inhibition curves obtained for all the samples related to CW (A) and WPI (B). In the graph are presented the curves of the reference antigen (black), the undigested protein (light green), gastric fraction 1 (G1, purple), gastric fraction 3 (G3, red), gastric fraction 5 (G5, yellow), intestinal fraction 1 (I1, orange), intestinal fraction 3 (I3, blue), intestinal fraction 5 (I5, brown).

**Table S2** MS ions of the synthesised peptides identified from the HPLC-MS spectra.

|                                                              | MS calculated ions                                                                                                      | MS identified ions                                           |
|--------------------------------------------------------------|-------------------------------------------------------------------------------------------------------------------------|--------------------------------------------------------------|
| <b>Unreacted peptide</b><br>( <i>R. T.</i> 61.2 min)         | 1468.8 [M+H] <sup>+</sup> ; 734.9 [M+2H] <sup>2+</sup> ;<br>490.29 [M+3H] <sup>3+</sup> ; 367.97 [M+4H] <sup>4+</sup>   | 1470.6 [M+H] <sup>+</sup> ;<br>735.15 [M+2H] <sup>2+</sup>   |
| <b>Mono-Lactosylated peptide</b><br>( <i>R. T.</i> 59.6 min) | 1792.87 [M+H] <sup>+</sup> ; 896.94 [M+2H] <sup>2+</sup> ;<br>598.27 [M+3H] <sup>3+</sup> ; 448.97 [M+4H] <sup>4+</sup> | 1794.57 [M+H] <sup>+</sup> ;<br>897.25 [M+2H] <sup>2+</sup>  |
| <b>Di-Lactosylated peptide</b><br>( <i>R. T.</i> 58.9 min)   | 2116.87[M+H] <sup>+</sup> ; 1058.94 [M+2H] <sup>2+</sup> ;<br>706.27 [M+3H] <sup>3+</sup> ; 529.97 [M+4H] <sup>4+</sup> | 1059.74 [M+2H] <sup>2+</sup> ;<br>706.7 [M+3H] <sup>3+</sup> |

R.T., HPLC retention time

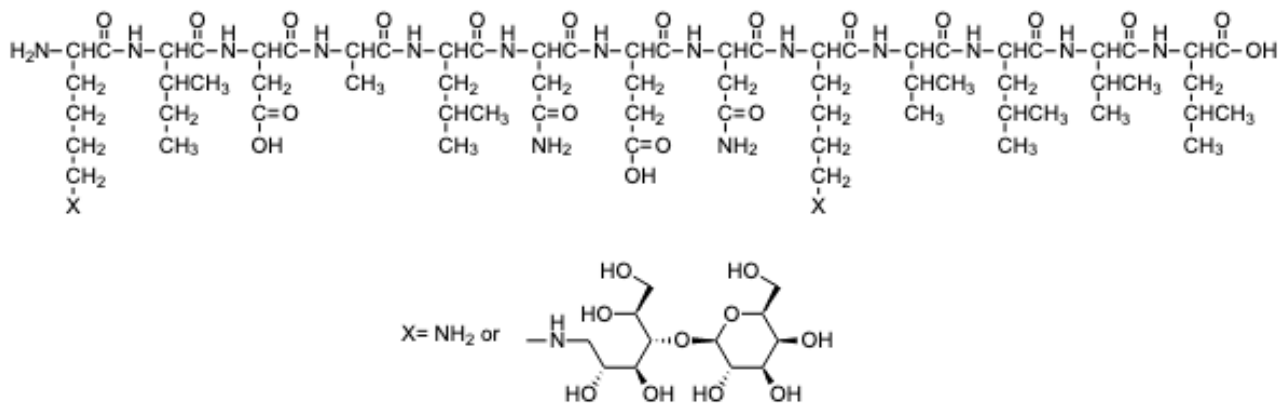

**Figure S2** Peptide sequence KIDALNENKVLVL. Lactose can bind one or two lysine residues.
